# Supplementary material for: Targeting Ca2+ and Mitochondrial Homeostasis by Antipsychotic Thioridazine in Leukemia Cells
Source: MDPI journal article supplement (doi:10.3390/life12101477), 2022-09-23
Supplement: s1 [file s1]

**Table S1.** List of 84 genes analyzed using the PCR Array RT<sup>2</sup> Profiler – Human Cell Death Pathway Finder.

| Pathway   | Genes                                                                                                                                                                                                                                                                                                                                                                        |
|-----------|------------------------------------------------------------------------------------------------------------------------------------------------------------------------------------------------------------------------------------------------------------------------------------------------------------------------------------------------------------------------------|
| Apoptosis | ABL1, APAF1, ATP6V1G2, BAX, BCL2L11, BIRC2 (c-IAP2), CASP1 (ICE), CASP3, CASP6, CASP7, CASP9, CD40 (TNFRSF5), CD40LG (TNFSF5), CFLAR (CASPER), CYLD, DFFA, FAS (TNFRSF6), FASLG (TNFSF6), GADD45A, NOL3, SPATA2, SYCP2, TNF, TNFRSF1A, TNFRSF10A (TRAIL-R), TP53, AKT1, BCL2, BCL2A1 (Bfl-1/A1), BCL2L1 (BCL-X), BIRC3 (c-IAP1), CASP2, IGF1R, MCL1, TNFRSF11B, TRAF2, XIAP. |
| Autophagy | AKT1, APP, ATG12, ATG16L1, ATG3, ATG5, ATG7, BAX, BCL2, BCL2L1 (BCL-X), BECN1, CASP3, CTSS, CTSS, ESR1 (ERa), FAS (TNFRSF6), GAA, HTT, IFNG, IGF1, INS, IRGM, MAP1LC3A, MAPK8 (JNK1), NFKB1, PIK3C3 (VPS34), RPS6KB1, SNCA, SQSTM1, TNF, TP53, ULK1                                                                                                                          |
| Necrosis  | ATP6V1G2, BMF, C1orf159, CCDC103, COMMD4, CYLD, DEFB1, DENND4A, DPYSL4, EIF5B, FOXI1, GALNT5, GRB2, HSPBAP1, JPH3, KCNIP1, MAG, OR10J3, PARP1 (ADPRT1), PARP2, PVR, RAB25, S100A7A, SPATA2, SYCP2, TMEM57, TNFRSF1A, TXNL4B.                                                                                                                                                 |

Source: Qiagen, Frederick, MD, EUA.

**Table S2.** shRNA sequences used for CHOP knockdown in K562 cells.

| Lentiviral vector | Sequence                                                    |
|-------------------|-------------------------------------------------------------|
| TRCN0000007263    | CCGGGCCAATGATGTGACCCTCAATCTCGAGATTGAGGGTCACATCATTGGCTTTTT   |
| TRCN0000364328    | CCGGCTGCACCAAGCATGAACAATTCTCGAGAATTGTTTCATGCTTGGTGCAGTTTTTG |
| TRCN0000364393    | CCGGTGAACGGCTCAAGCAGGAAATCTCGAGATTTCCTGCTTGAGCCGTTCATTTTTG  |
